# Supplementary material for: A broadband polarization-sensitive photodetector and an infrared encoder based on high crystallinity 1D Bi2(Se,S)3 ternary nanowires
Source: Royal Society of Chemistry journal article supplement (doi:10.1039/d5mh00033e), 2025-01-01
Supplement: d5mh00033e1.pdf [file d5mh00033e1.pdf]

## Supporting information

### **Broadband Polarization-Sensitive Photodetector and Infrared Encoder Based on High Crystallinity 1D $\text{Bi}_2(\text{Se,S})_3$ Ternary Nanowires**

Yu Zhang<sup>a</sup>, Wenhao Fan<sup>a</sup>, Weijie Bai<sup>a</sup>, Wei Yan<sup>b</sup>, Xinjian Liu<sup>a</sup>, Yanxia Li<sup>a</sup>, Mengyang Li<sup>a</sup>, Jiayu Zhao<sup>a</sup>, Jin Zhang<sup>a</sup>, Shougen Yin<sup>a</sup> and Hui Yan<sup>a,\*</sup>

<sup>a</sup> Key Laboratory of Display Materials and Photoelectric Devices (Ministry of Education), Tianjin Key Laboratory of Photoelectric Materials and Devices, National Demonstration Center for Experimental Function Materials Education, School of Materials Science and Engineering, Tianjin University of Technology, Tianjin 300384, China

<sup>b</sup> School of Science, Nanjing University of Posts and Telecommunications, Nanjing 210023, China

E-mail: H. Yan: [yanhui581@163.com](mailto:yanhui581@163.com); [yanhui@tjut.edu.cn](mailto:yanhui@tjut.edu.cn).

ORCID: Hui Yan: 0000-0001-7902-458X

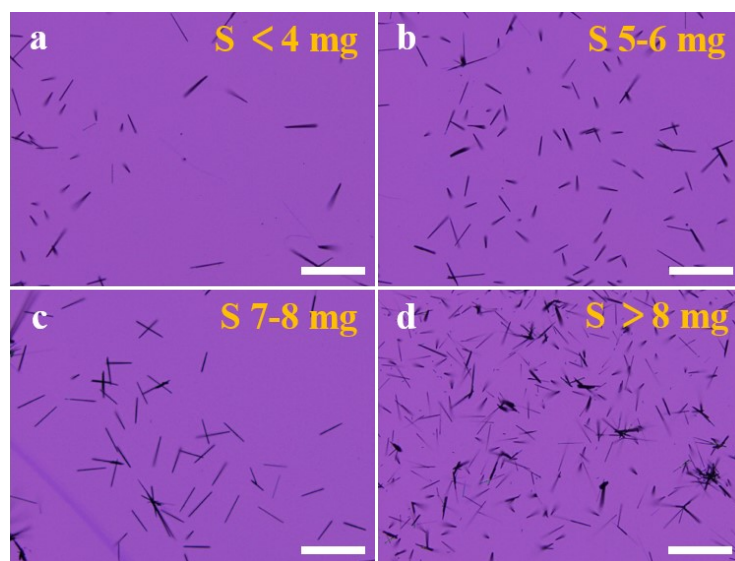

**Fig. S1** OM images of  $\text{Bi}_2(\text{Se,S})_3$  nanowires grown with different S amount (a) < 4 mg, (b) 5-6 mg, (c) 7-8 mg, (d) > 8mg. The scale bar is 100  $\mu\text{m}$ .

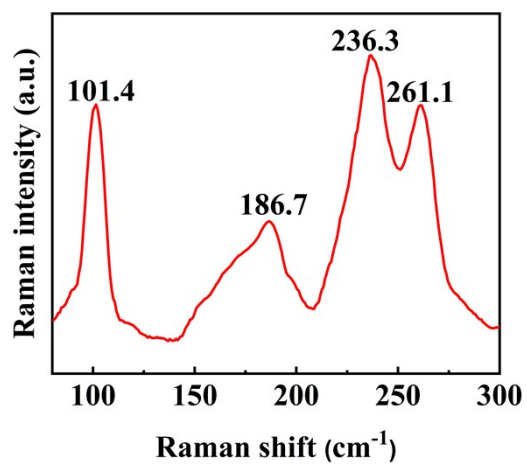

**Fig. S2** Raman spectrum of  $\text{Bi}_2\text{S}_3$  nanowire.

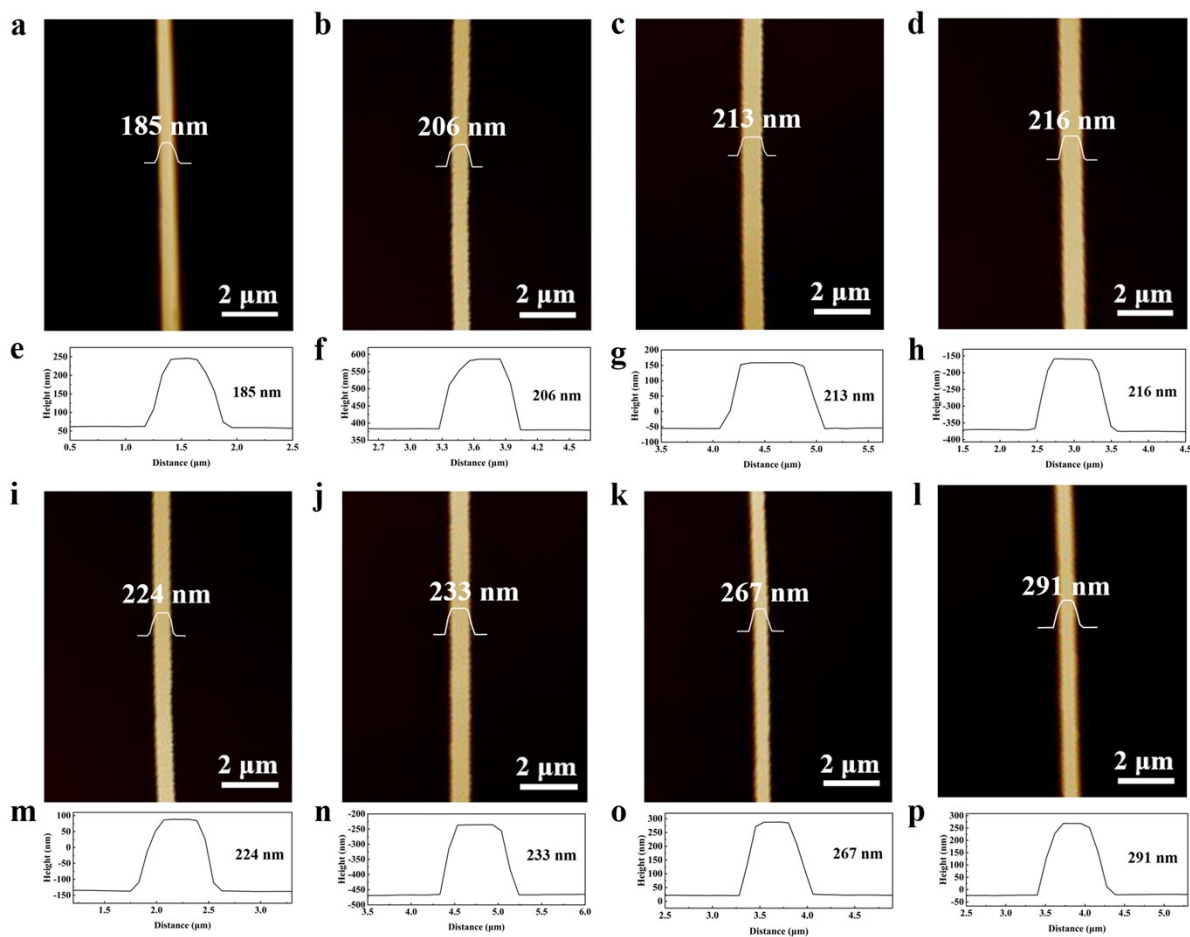

**Fig. S3** (a-d, i-l) AFM images of  $\text{Bi}_2(\text{Se,S})_3$  nanowires grown on  $\text{SiO}_2/\text{Si}$  substrate. (e-h, m-p) Height distribution profiles corresponding to the above AFM images.

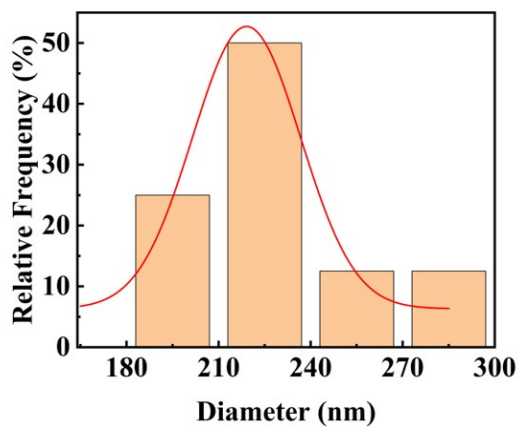

**Fig. S4** Statistical distribution of nanowire diameter.

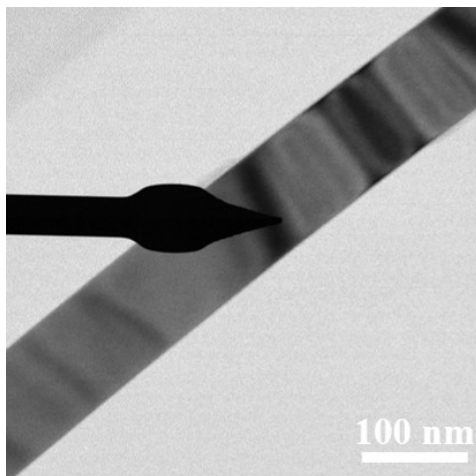

**Fig. S5** Low-magnification TEM image of a typical  $\text{Bi}_2(\text{Se,S})_3$  nanowire.

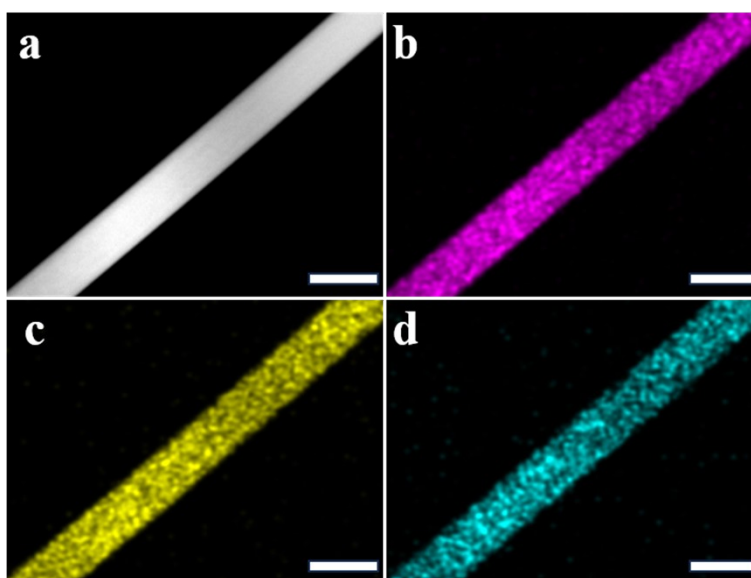

**Fig. S6** (a) Low-magnification HAADF TEM image of a  $\text{Bi}_2(\text{Se,S})_3$  nanowire. Corresponding EDS element mapping of (b) Bi, (c) S and (d) Se element. The scale bar is 100 nm.

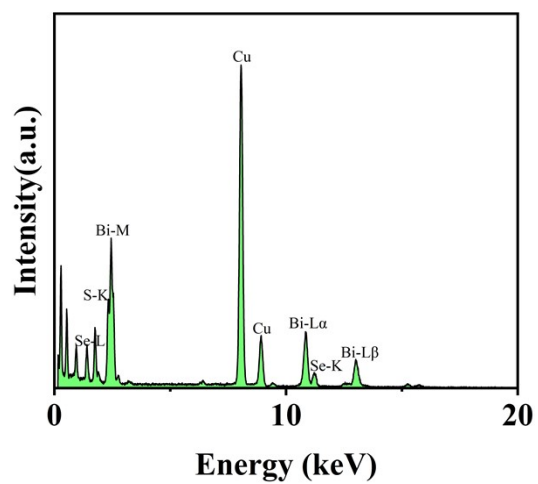

**Fig. S7** EDS spectrum of the  $\text{Bi}_2(\text{Se,S})_3$  nanowire.

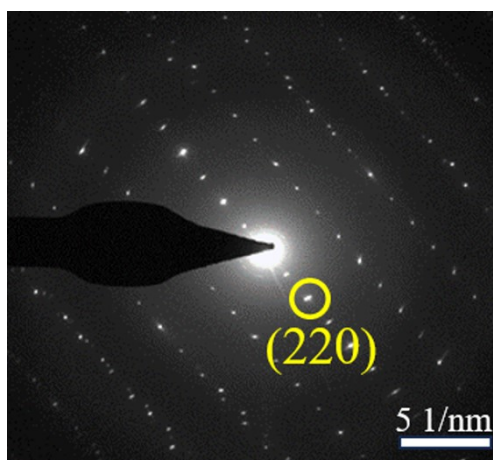

**Fig. S8** SAED pattern of  $\text{Bi}_2(\text{Se,S})_3$  nanowires.

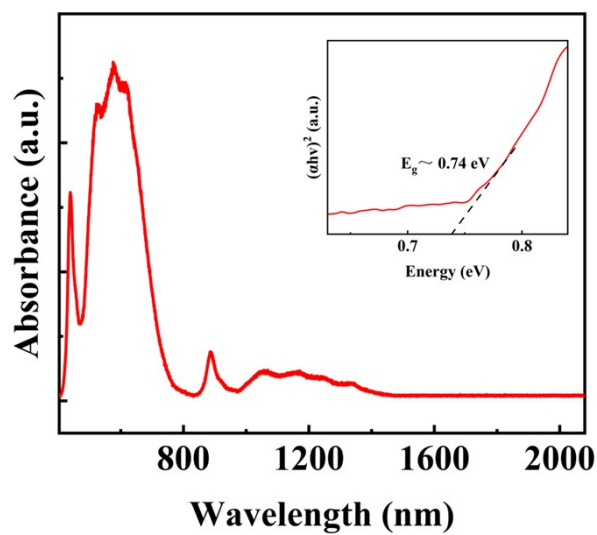

**Fig. S9** Absorption spectrum of the  $\text{Bi}_2(\text{Se,S})_3$  nanowires. The insert is the plot of  $(\alpha h\nu)^2$  versus energy of the exciting light.

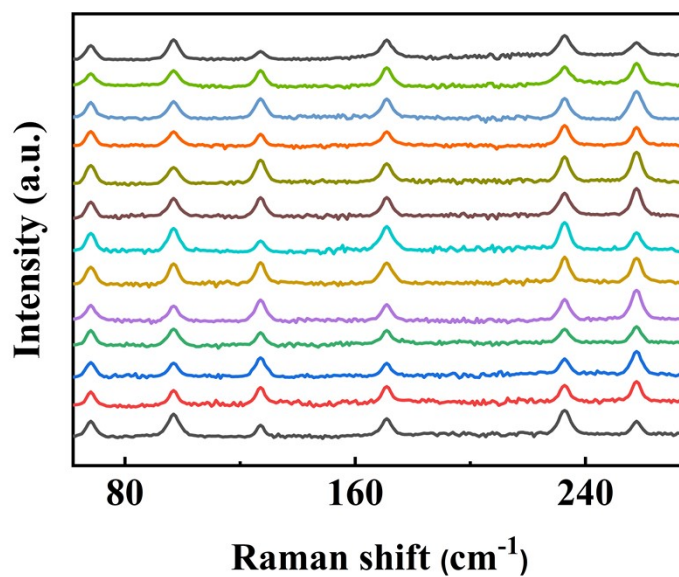

**Fig. S10** The angle-resolved Raman scattering spectra under parallel configuration irradiated by 532 nm laser.

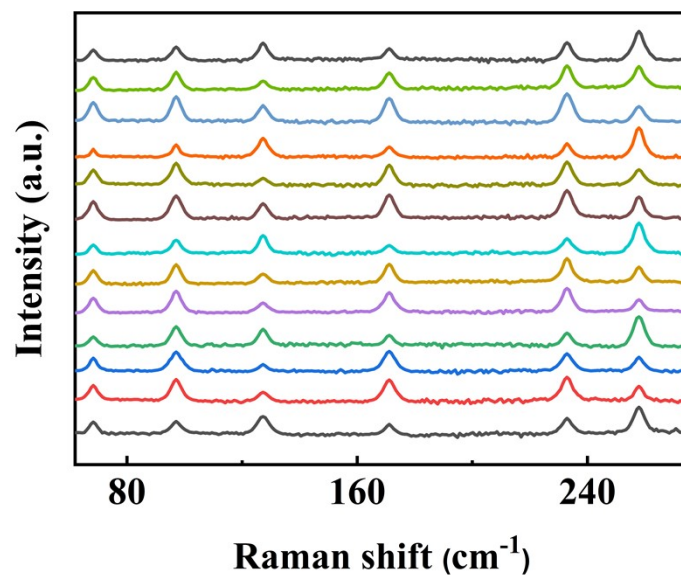

**Fig. S11** The angle-resolved Raman scattering spectra under vertical configuration irradiated by 532 nm laser.

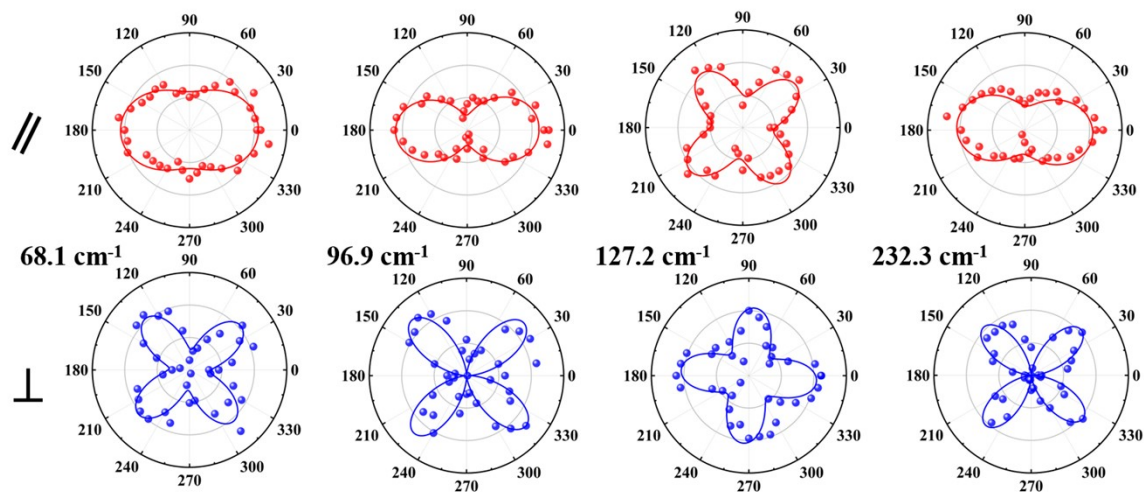

**Fig. S12** The polar plots of angle-resolved Raman intensity corresponding to peak 68.1  $\text{cm}^{-1}$ , 96.9  $\text{cm}^{-1}$ , 127.2  $\text{cm}^{-1}$  and 232.3  $\text{cm}^{-1}$ , respectively under parallel (//) and cross configurations ( $\perp$ ).

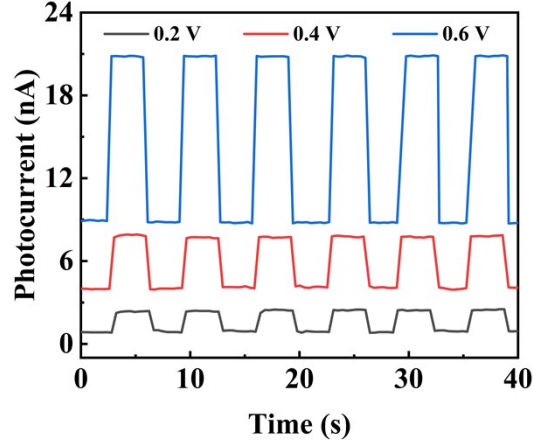

**Fig. S13** Time resolved photoresponse of the device at different  $V_{ds}$ .

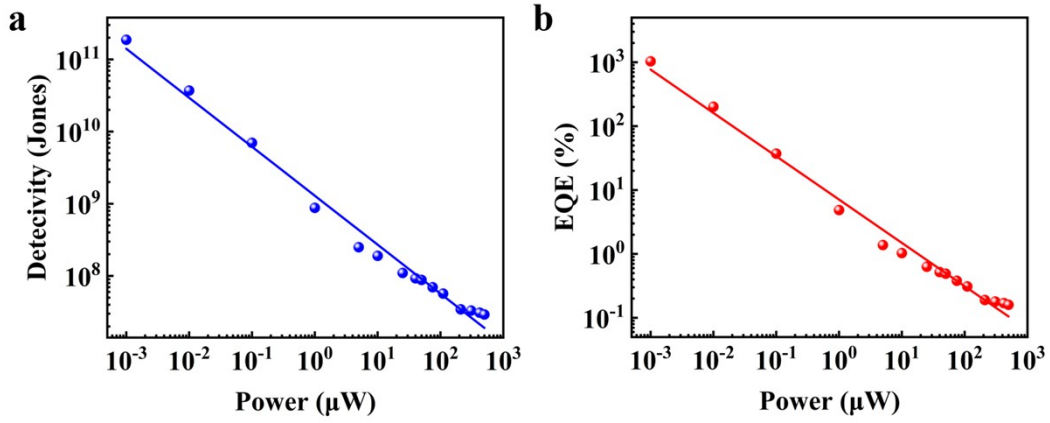

**Fig. S14** (a)  $D^*$  and (b)  $EQE$  as function of light power intensity of the  $Bi_2(Se,S)_3$  nanowire photodetector.

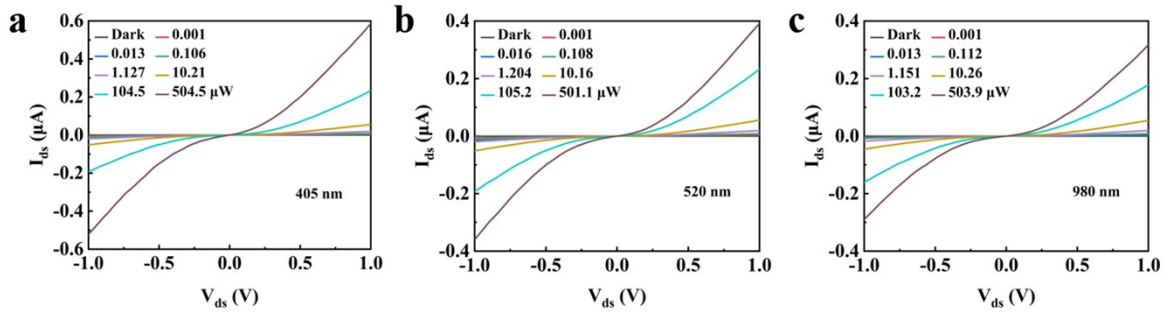

**Fig. S15** The  $I_{ds}$ - $V_{ds}$  curves of the  $Bi_2(Se,S)_3$  nanowire devices under different laser wavelengths.



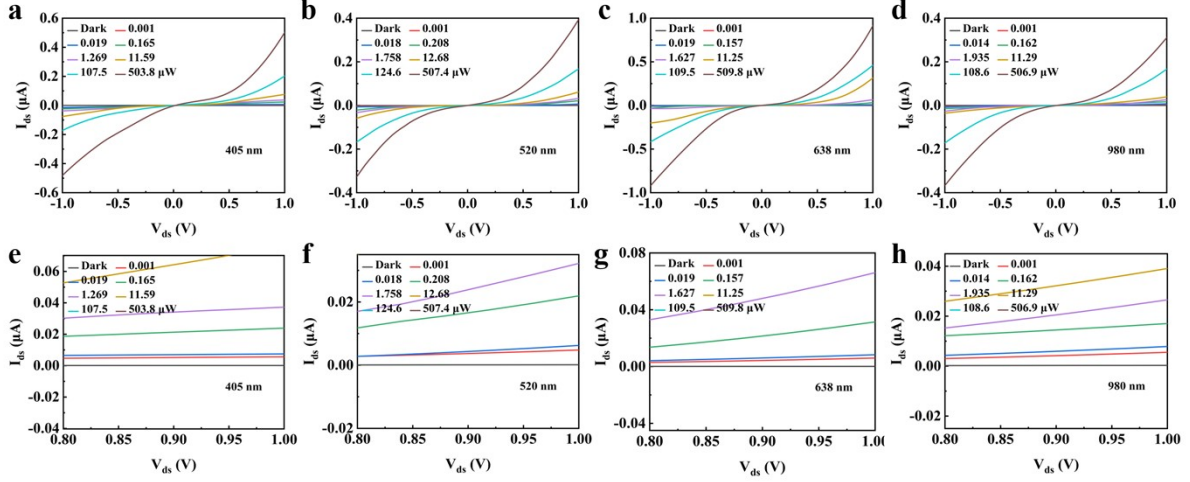

**Fig. S16** The  $I_{ds}$ - $V_{ds}$  curves of one  $\text{Bi}_2(\text{Se,S})_3$  nanowire device spin-coated with PMMA (device #1) under (a) 405 nm, (b) 520 nm, (c) 638 nm, and (d) 980 nm laser illumination. Local magnification of  $I_{ds}$ - $V_{ds}$  curves under (e) 405 nm, (f) 520 nm, (g) 638 nm, and (h) 980 nm laser illumination.

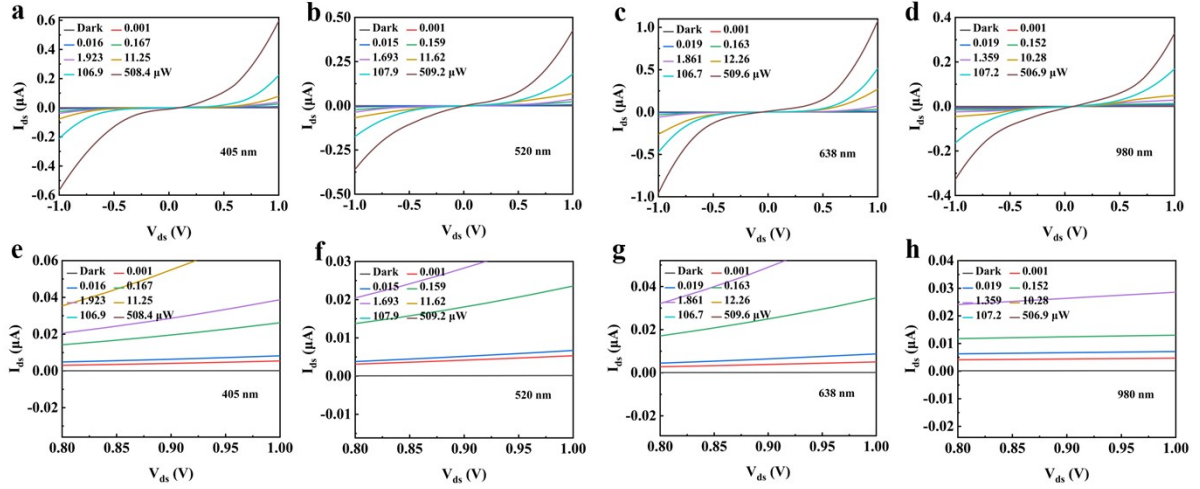

**Fig. S17** The  $I_{ds}$ - $V_{ds}$  curves of another  $\text{Bi}_2(\text{Se,S})_3$  nanowire device spin-coated with PMMA (device #2) under (a) 405 nm, (b) 520 nm, (c) 638 nm, and (d) 980 nm laser illumination. Local magnification of  $I_{ds}$ - $V_{ds}$  curves under (e) 405 nm, (f) 520 nm, (g) 638 nm, and (h) 980 nm laser illumination.

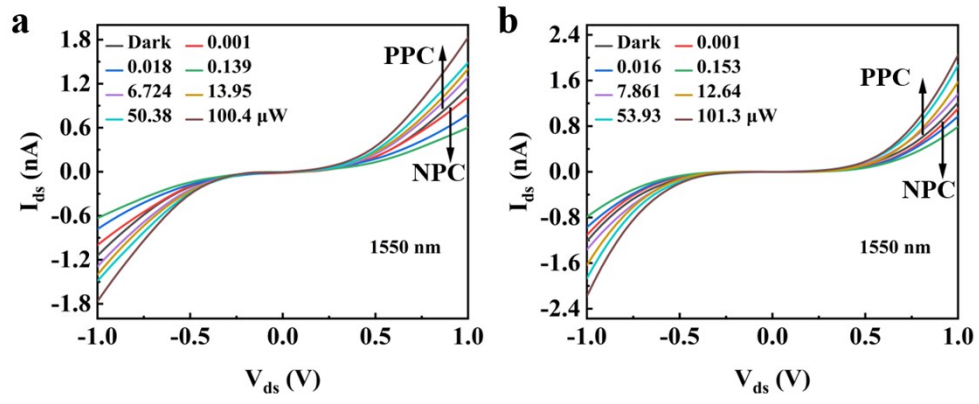

**Fig. S18** The  $I_{ds}$ - $V_{ds}$  curves of (a) device #1 and (b) device #2 under 1550 nm laser illumination.
